# Supplementary material
Source: PubMed Central journal article supplement (PMC3182521)
Supplement: NIHMS326384-supplement-SuppData.pdf [file NIHMS326384-supplement-SuppData.pdf]

# Mesoscale Simulations of Two Nucleosome-Repeat Length Oligonucleosomes

Supplemental figures

[Submitted to the Special Issue of *Physical Chemistry Chemical Physics*,  
Edited by P. Earis, M. Orozco, and C. Laughton, on Nucleic Acid Simulations]

Tamar Schlick<sup>1, 2</sup> and Ognjen Perišić<sup>1</sup>

<sup>1</sup>Department of Chemistry and Courant Institute of Mathematical Sciences, New York University,  
251 Mercer Street, New York, New York 10012, Tel.: 212-998-3116; schlick@nyu.edu; fax:  
212-995-4152.

<sup>2</sup>To whom correspondence should be addressed.

October 1, 2009

## Figure captions

**Figure S1:** Nucleosome contact patterns for 12-unit oligonucleosomes at two nucleosome repeat lengths (NRL) at 0.15 monovalent salt, with and without linker histone (+/-LH), and with and without divalent ions (+/-Mg), from zigzag (dashed) and solenoid (solid line) starting configurations.

**Figure S2:** DNA bending angle distributions for for 12-unit oligonucleosomes at the longer repeat length (NRL = 209) at 0.15 monovalent salt, with and without linker histone (+/-LH), and with and without divalent ions (+/-Mg), from zigzag (dashed) and solenoid (solid line) starting configurations.

**Figure S3:** Convergence of the Monte Carlo sampling accessed through the behavior of the total fiber energy, sedimentation coefficients, triplet angles, and dimer distances between three consecutive nucleosomes, with linker histone and monovalent salt, averaged over 12 simulations started from zigzag (a) and solenoid (b) initial configurations (24-mer oligonucleosomes).

**Figure S4:** Total energy, triplet angles (cumulative average), and dimer distances (cumulative average) for three different trajectories for zigzag (a), and solenoid (b) starting configurations.

**Figure S5:** Description of the fiber axis calculation for 24-unit oligonucleosome. a) Cyan - nucleosome cores, Red lines - connections between consecutive nucleosomes, Green line - fiber axis, as estimated by the least squares procedure; b) Fiber

axis decomposition into three separate curves for three vectors (x, y, and z); Blue dots - nucleosome centers, Green line - fiber axis, Red dots - separators between line segments of the fiber axis.

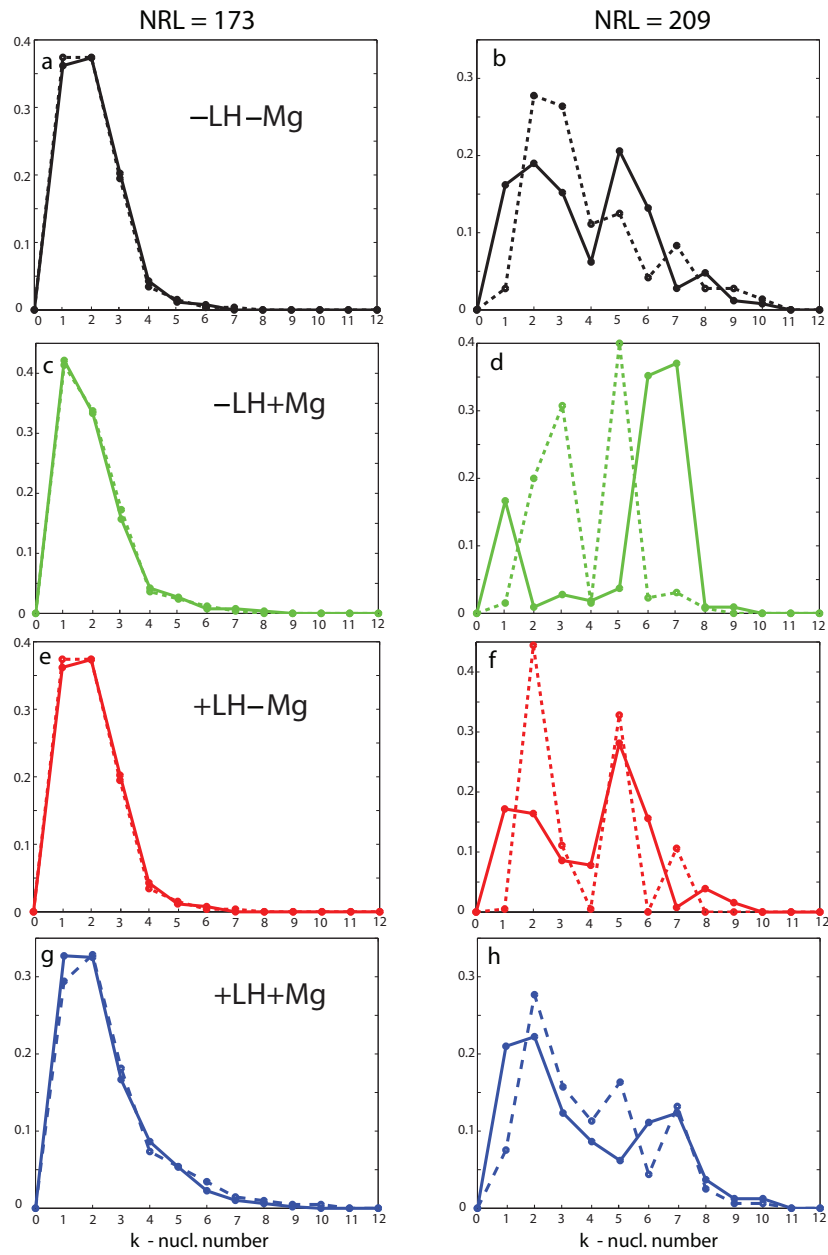

Figure S1:

NRL = 209

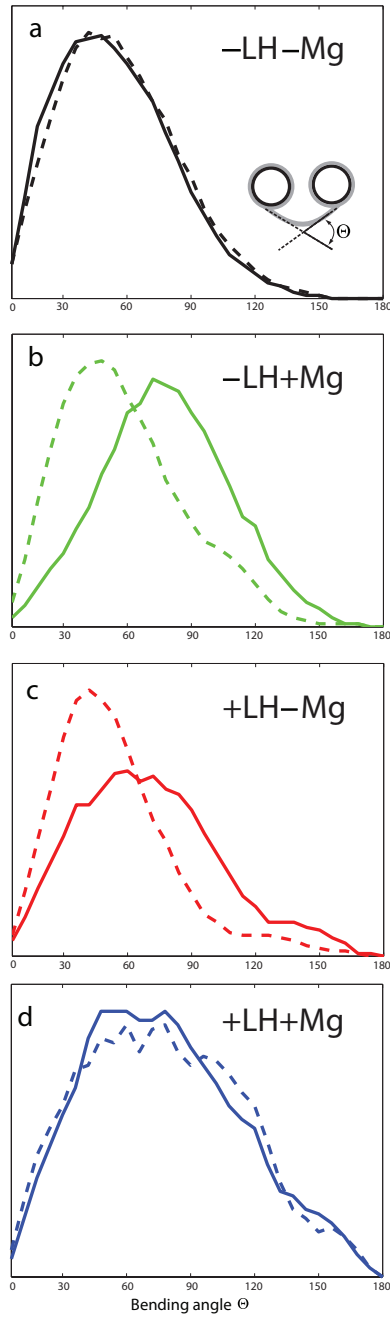

Figure S2:

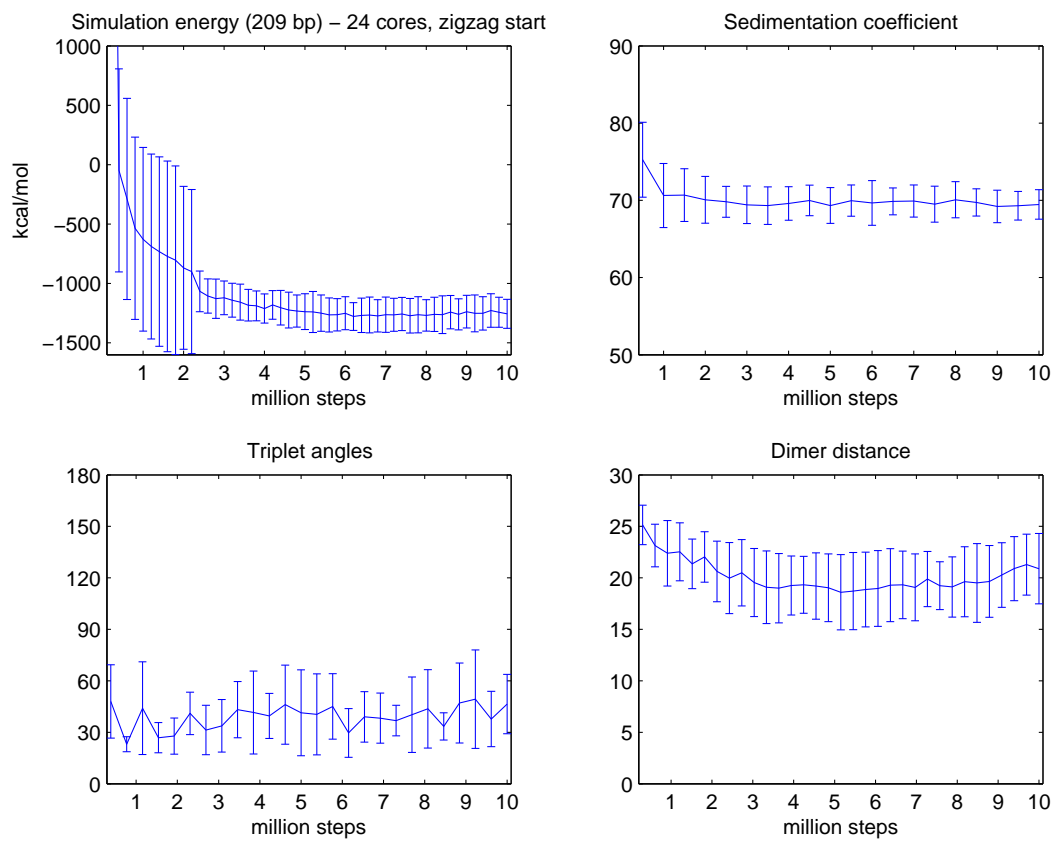

Figure S3:

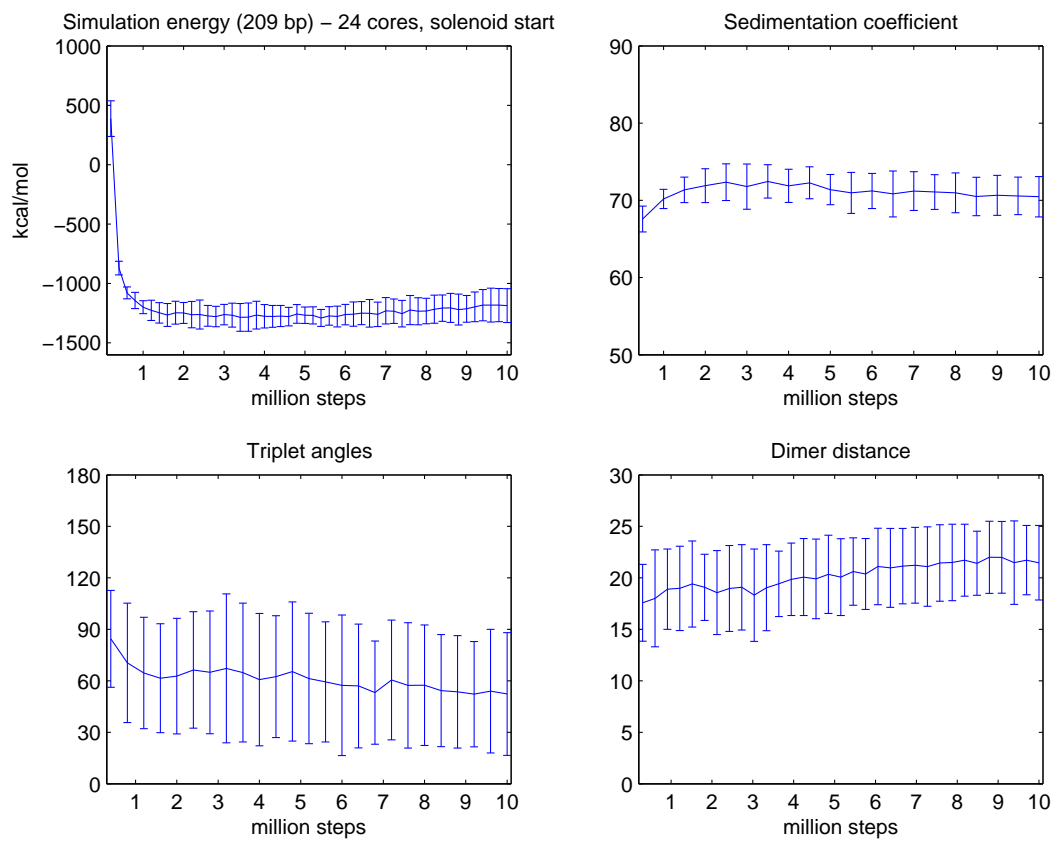

Figure S3: cont.

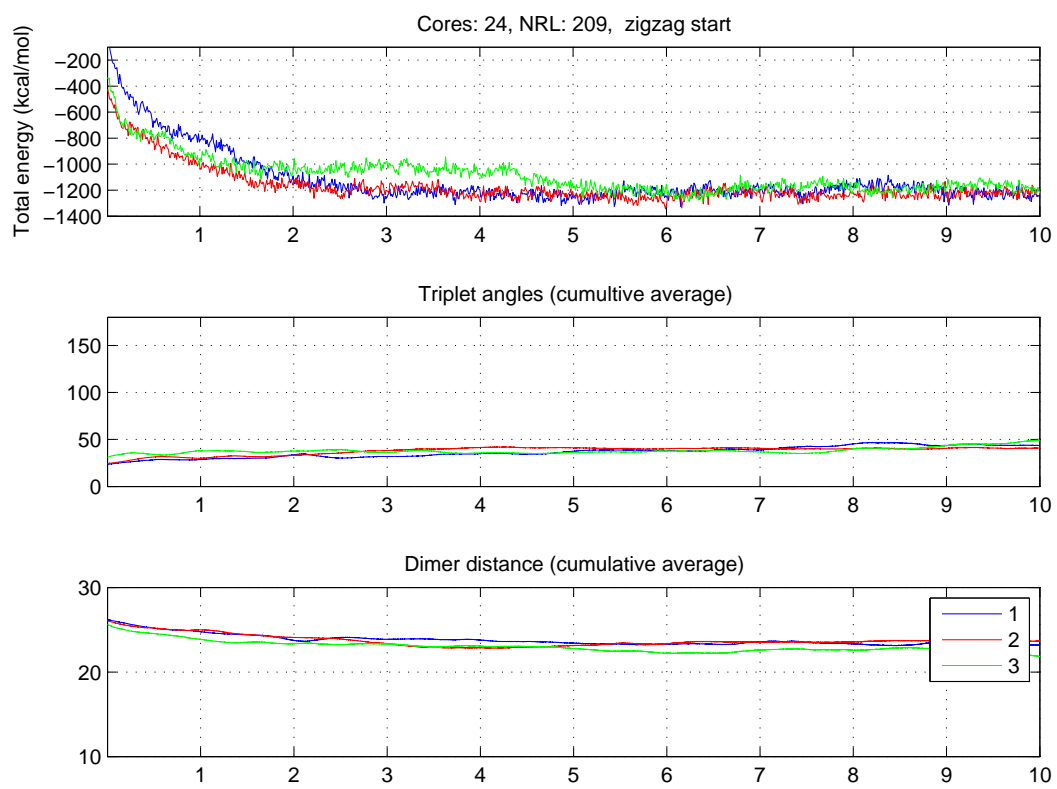

Figure S4: a



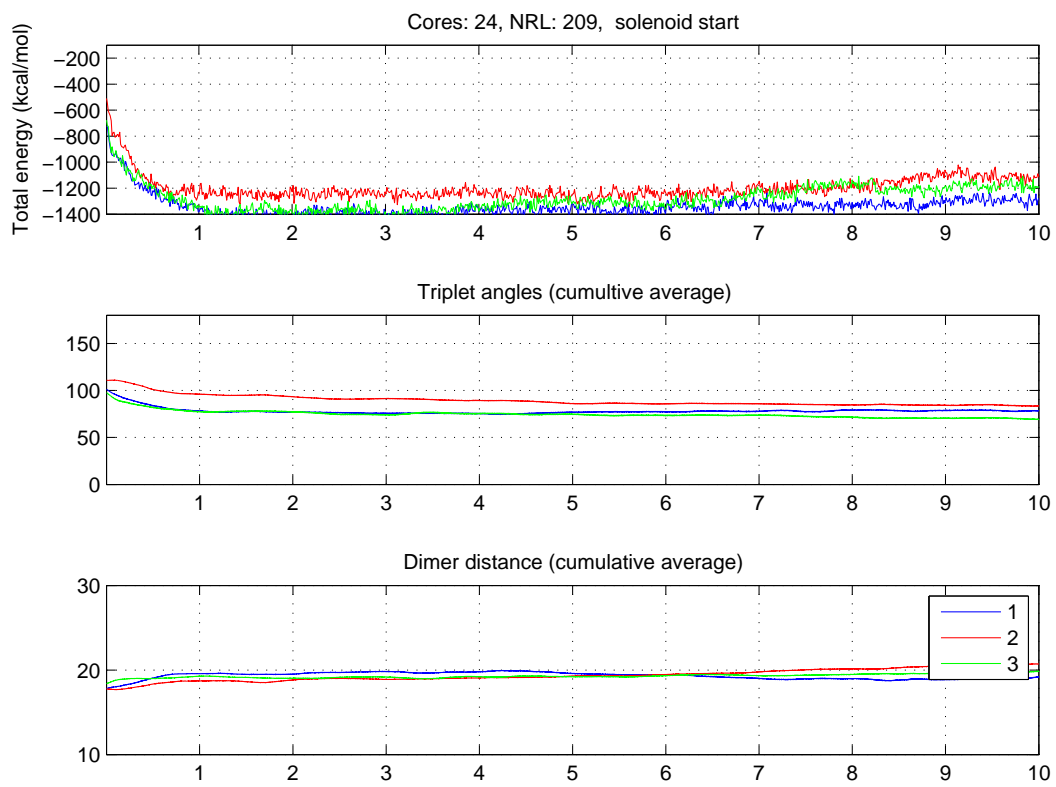

Figure S4: b

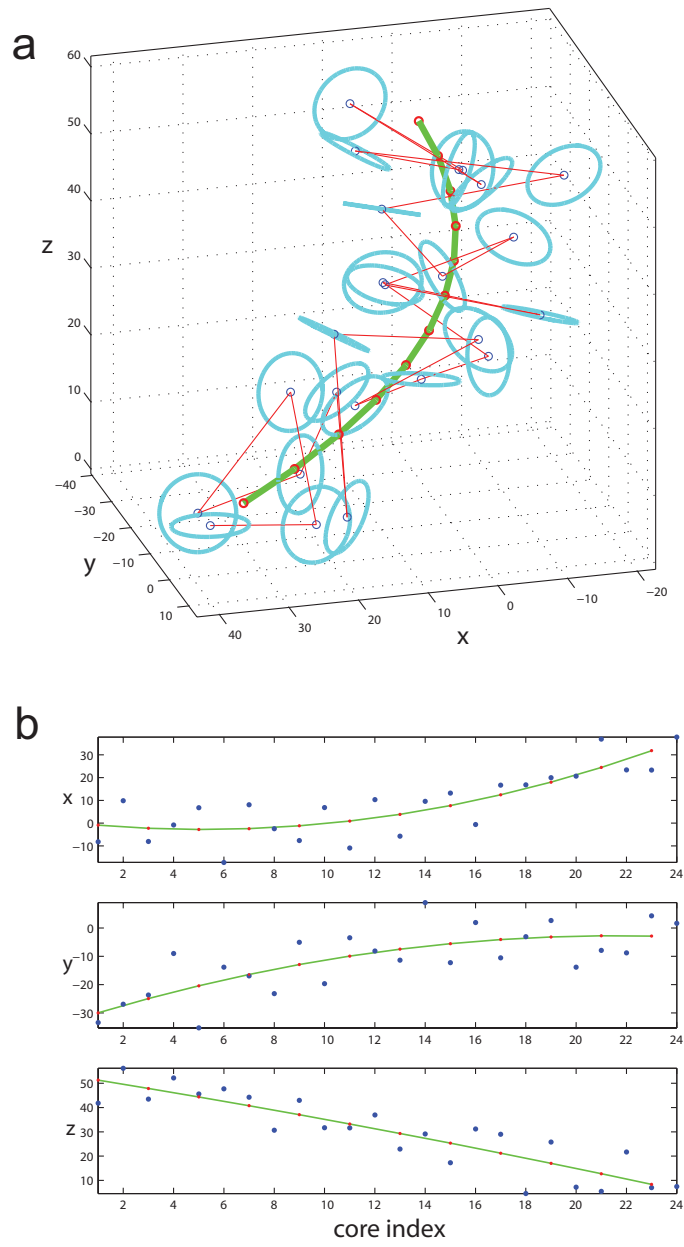

Figure S5:
